# Supplementary material
Source: PubMed Central journal article supplement (PMC5116661)
Supplement: Supp_Table1.pdf [file Supp_Table1.pdf]

SUPPLEMENTARY TABLE S1. ANTIBODIES EMPLOYED

| <i>Primary antibody</i> | <i>Company</i>                       | <i>Catalog No.</i> |
|-------------------------|--------------------------------------|--------------------|
| GFP                     | Abcam                                | Ab13970            |
| SPC                     | Seven Hills Bioreagents              | WRAB 09337         |
| CC10                    | Santa Cruz                           | Sc-9773            |
| CC10                    | Seven Hills Bioreagents              | WRAB-3950          |
| T1-alpha                | Developmental Studies Hybridoma Bank | 8.1.1              |
| Sox2                    | Seven Hills Bioreagents              | WRAB 1236          |
| CGRP                    | Sigma clone 4901                     | Prod No. C7113     |
| P63                     | Santa Cruz                           | SC 8431            |
| Beta-tubulin IV         | BioGenex                             | Mu178              |
| Alpha-SMA               | Sigma                                | C6198              |
| CD31                    | NeoMarkers                           | RB-10333-P1        |
| Tuj                     | BioLegend                            | 801202             |
| Beta-2-microglobulin    | Abcam                                | Ab15976            |
| E-cadherin              | BD Biosciences                       | 610181             |
| BrdU                    | BD Biosciences                       | 347580             |
| Ki67                    | Thermo Fisher                        | 9106-s1            |
